# Supplementary material for: Taking lanthanides out of isolation: tuning the optical properties of metal–organic frameworks
Source: Royal Society of Chemistry journal article supplement (doi:10.1039/d0sc00740d), 2020-01-01
Supplement: d0sc00740d2.pdf [file d0sc00740d2.pdf]

## Taking Lanthanides out of isolation: tuning the optical properties of metal-organic frameworks

Samantha L. Anderson,<sup>†,§</sup> Davide Tiana,<sup>†,‡,§</sup> Christopher P. Ireland,<sup>†,§</sup> Gloria Capano,<sup>†</sup> Maria Fumanal,<sup>†</sup> Andrzej Gładysiak,<sup>†</sup> Stavroula Kampouri,<sup>†</sup> Aiman Rahmanudin,<sup>¶</sup> Néstor Guijarro,<sup>¶</sup> Kevin Sivula,<sup>¶</sup> Kyriakos C. Stylianou,<sup>†</sup> and Berend Smit\*<sup>†</sup>

<sup>†</sup> Laboratory of molecular simulation (LSMO), Institut des Sciences et Ingénierie Chimiques, Valais Ecole Polytechnique Fédérale de Lausanne (EPFL), Rue de l'Industrie 17, CH-1951 Sion, Switzerland

<sup>‡</sup> School of Chemistry, University College Cork, College Rd, Cork, Ireland

<sup>¶</sup> Laboratory for Molecular Engineering of Optoelectronic Nanomaterials (LIMNO), Institut des Sciences et Ingénierie Chimiques (ISIC), Ecole Polytechnique Fédérale de Lausanne (EPFL), CH-1015 Lausanne, Switzerland

<sup>§</sup> Contributed equally to this work

E-mail: berend.smit@epfl.ch

## Table of Contents

|                                                                              |    |
|------------------------------------------------------------------------------|----|
| 1. Experimental.....                                                         | 3  |
| 1.1: Materials and characterization methods.....                             | 3  |
| 1.2: Synthesis of <b>Ln-SION-2</b> and <b>Ln-SION-1</b> .....                | 3  |
| 2. Single crystal X-ray diffraction.....                                     | 4  |
| 3. Characterization for <b>Ln-SION-2</b> and <b>Ln-SION-1</b> .....          | 4  |
| 3.1: Powder X-ray diffraction of <b>Ln-SION-2</b> and <b>Ln-SION-1</b> ..... | 4  |
| 3.2: UV/Vis of <b>Ln-SION-2</b> and <b>Ln-SION-1</b> .....                   | 8  |
| 4. Computational details.....                                                | 10 |
| 5. Computed cell parameters.....                                             | 11 |
| 6. Optimized bond distances.....                                             | 12 |
| 7. Density of states of DHBDC and Ln-SION-2.....                             | 14 |
| 8. Density of states of Ln-SION-1.....                                       | 16 |
| 9. Electronic transition.....                                                | 24 |
| 10. Current voltage (I-V) curves.....                                        | 26 |
| 11. H <sub>2</sub> generation.....                                           | 28 |
| 12. References.....                                                          | 30 |

# 1 Experimental

## 1.1 Materials and Characterization Methods

All chemicals were purchased from Sigma Aldrich, Alfa Aesar, and Carl Roth and used without further purification. Elemental analyses were performed on a Thermo Scientific Flash 2000 Organic Elemental Analyzer. Powder X-ray diffraction data were collected on a Bruker D8 Advanced using Cu K $\alpha$  radiation ( $\lambda = 1.5418 \text{ \AA}$ , 50 kW/40mA). Simulated powder X-ray diffraction patterns were generated from the single crystal data using Mercury 3.0. The diffuse reflectance spectra were obtained with a PerkinElmer UV-Vis Spectrometer Lambda-950S on solid state samples using a quartz holder. The diffuse reflectance/Kubelka-Munk transformation ( $\alpha/S = (1-R)^2/2R$ ) was then plotted.

## 1.2 Synthesis of Ln-SION-1 and Ln-SION-2

**Synthesis of Ln-SION-2.** 2,5-dihydroxyterephthalic acid (20 mg), Ln(NO<sub>3</sub>)<sub>3</sub>·6H<sub>2</sub>O (20 mg) (where Ln: Ce, Nd, Eu, Gd, Tb, and Yb) were weighed into a 10 mL scintillation vial. 2 mL of DMF were added, and stirred until the entire solution was clear. Following this, 0.5 mL of H<sub>2</sub>O was added, and the vials were subsequently sealed. The vials were placed in an oven and heated at 120°C, for 24 hrs with a temperature ramp of 2.0°C, and cooling ramp of 0.2°C (67 % yield based on Tb(III)). The formula of **Tb-SION-2** was determined to be [Tb<sub>2</sub>(DHBDC)<sub>3</sub>(DMF)<sub>4</sub>] $\cdot$ 2DMF on the basis of the combined results of single-crystal X-ray diffraction (SCXRD) and elemental analysis (EA). Anal. Calcd for [Tb<sub>2</sub>(DHBDC)<sub>3</sub>(DMF)<sub>4</sub>] $\cdot$ 2DMF : C 37.51, H 3.05, N 6.25. Experimental: C 37.27, H 4.14, N 6.20.

**Ln-SION-1** (where Ln: Ce, Nd, Eu, Gd, Tb, Dy, Er, Yb and Lu) was synthesized using the same conventional heating parameters as **SION-2** with the exception of increasing the time to 72 hrs (76 % yield based on Tb). The formula of **Tb-SION-1** was determined to be [Tb<sub>2</sub>(DHBDC)(DOBDC)(DMF)<sub>2</sub>] (DOBDC = 2,5-dioxido-1,4-benzenedicarboxylate) on the basis of the combined results of SCXRD and EA. Anal. Calcd for [Tb<sub>2</sub>(DHBDC)(DOBDC)(DMF)<sub>2</sub>] : C 30.93, H 2.36, N 3.28. Experimental: C 28.34, H 2.44, N 3.34. Collection of all materials was done via filtration, in which all powders were washed with DMF (3 x 10 mL).

The phase purity of all **Ln-SION-1** and **Ln-SION-2** frameworks was confirmed by the comparison of the experimental PXRD pattern with the simulated generated from the single crystal structure (**Tb-SION-1/Tb-SION-2**).

## 2 Single-Crystal X-ray Diffraction

Structures for **Tb-SION-1** and **Tb-SION-2** can be found in the Cambridge Crystallographic Data Center (CCDC) under reference codes CAQHEK (CCDC number: 1503702) and CAQVOI (CCDC number: 1503701).

### 3 Characterization of Ln-SION-2 and Ln-SION-1

#### 3.1 PXRD of Ln-SION-2 and Ln-SION-1

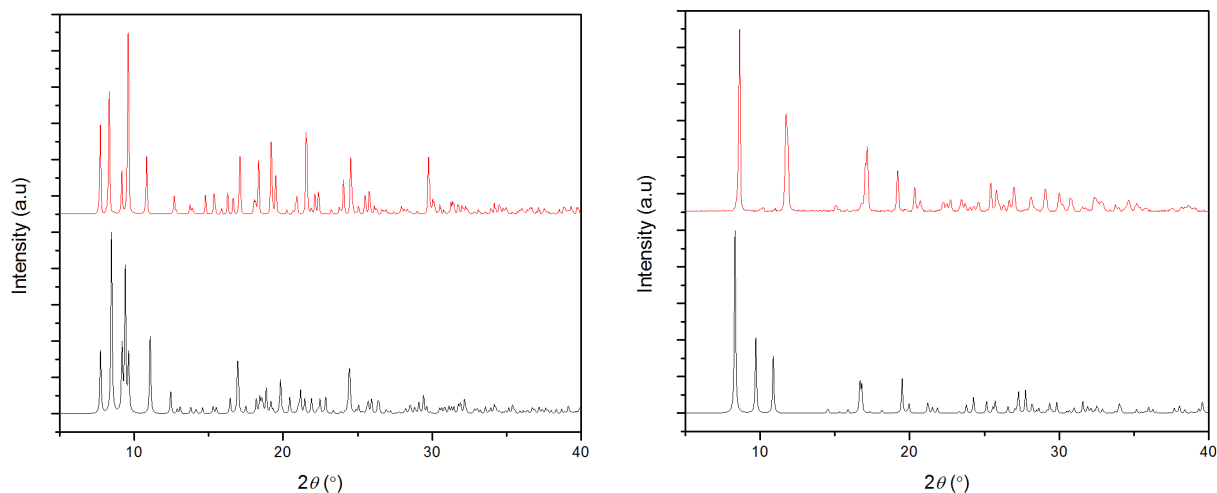

**Figure S1:** Left, PXRD of **Ce-SION-2**. Right, **Ce-SION-1**. Color scheme for both spectrum: black, theory; red, experimental.

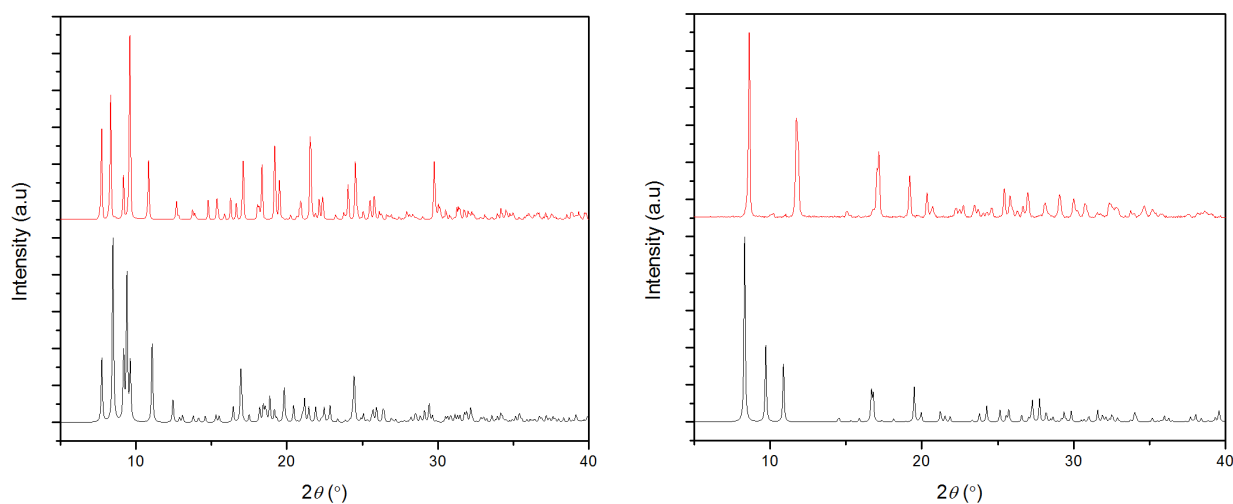

**Figure S2:** Left, PXRD of **Nd-SION-2**. Right, **Nd-SION-1**. Color scheme for both spectrum: black, theory; red, experimental.

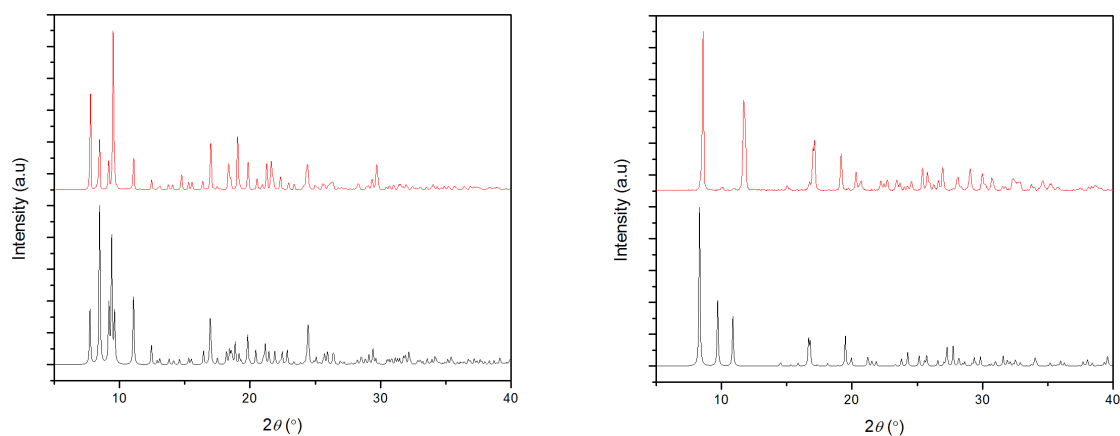

**Figure S3:** Left, PXRD of **Eu-SION-2**. Right, **Eu-SION-1**. Color scheme for both spectrum: black, theory; red, experimental.

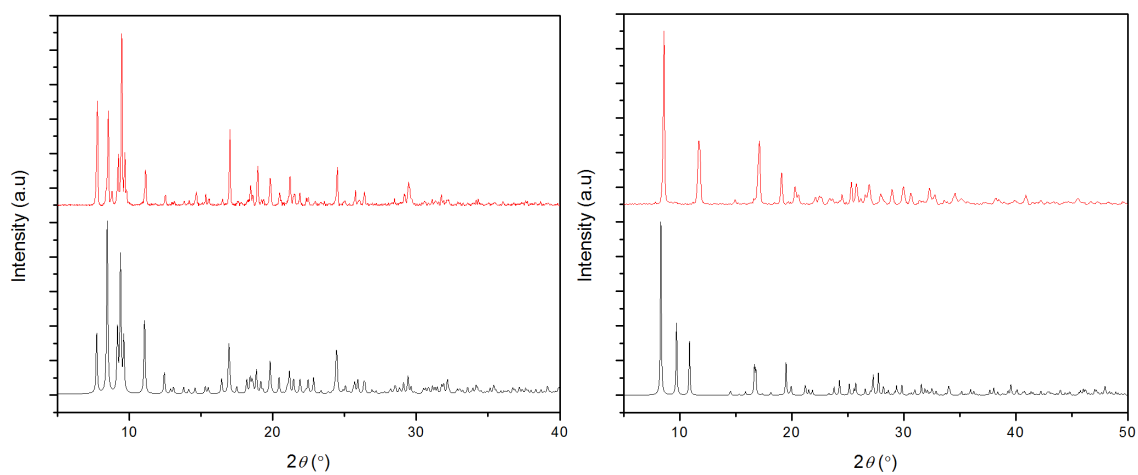

**Figure S4:** Left, PXRD of **Gd-SION-2**. Right, **Gd-SION-1**. Color scheme for both spectrum: black, theory; red, experimental.

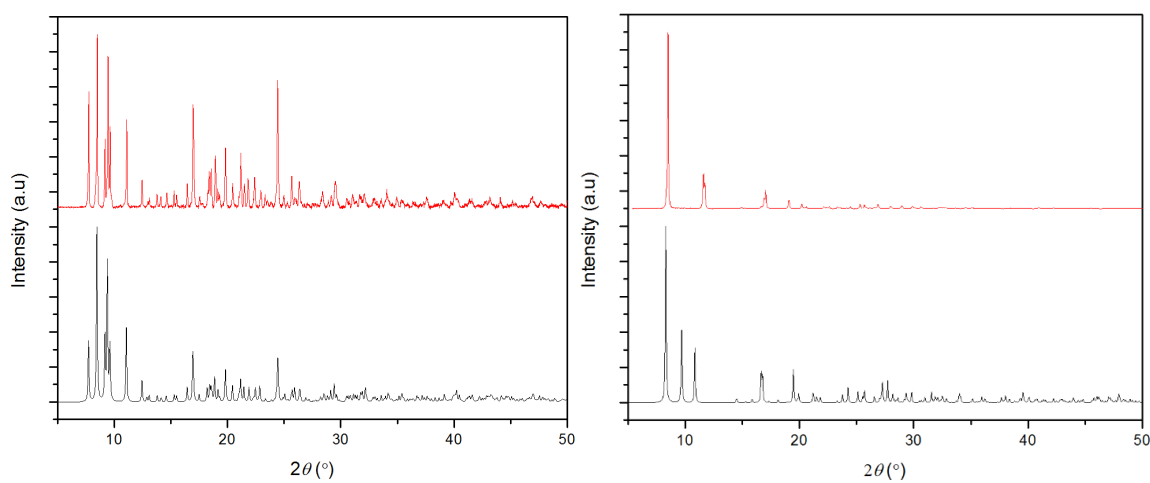

**Figure S5:** Left, PXRD of **Tb-SION-2**. Right, **Tb-SION-1**. Color scheme for both spectrum: black, theory; red, experimental.

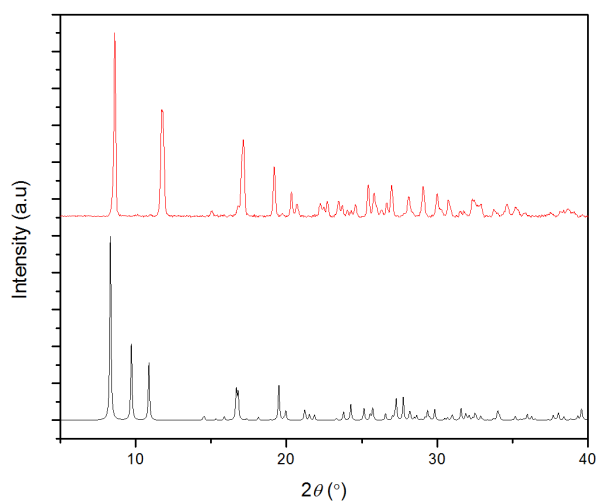

**Figure S6:** PXRD of **Dy-SION-1**. Color scheme: black, theory; red, experimental.

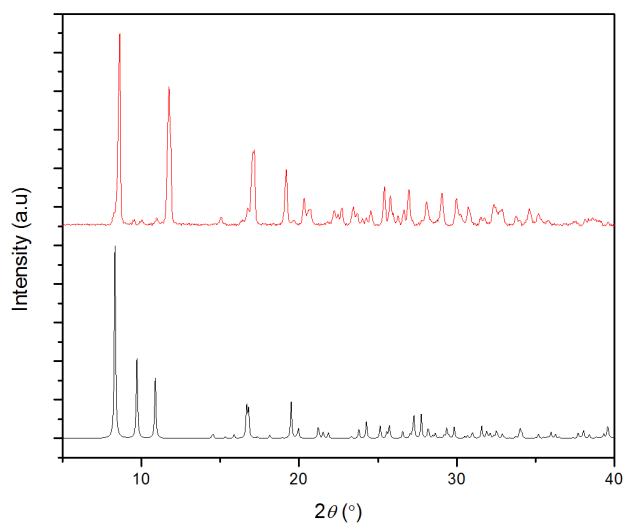

**Figure S7:** PXRD of **Ho-SION-1**. Color scheme: black, theory; red, experimental.

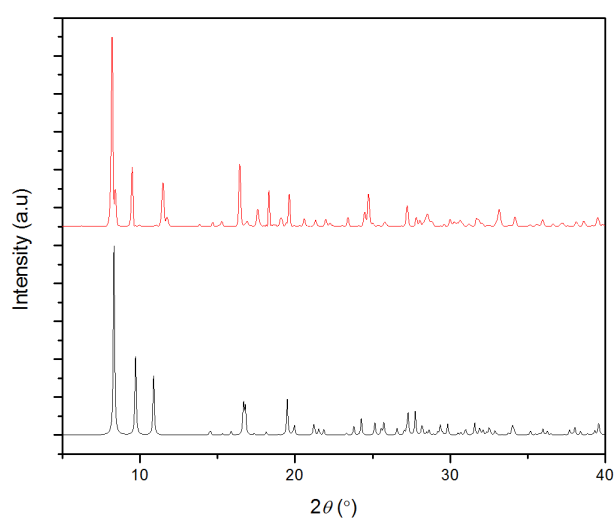

**Figure S8:** PXRD of **Er-SION-1**. Color scheme: black, theory; red, experimental.

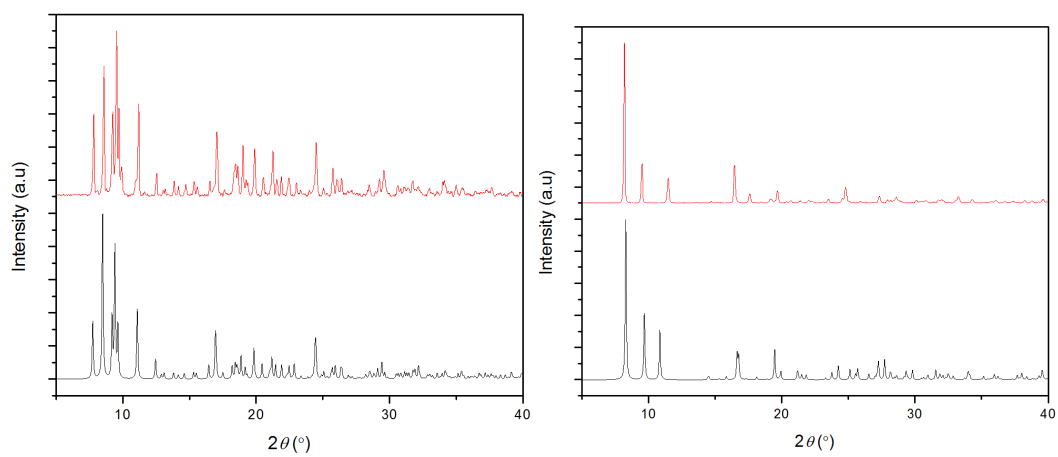

**Figure S9:** Left, PXRD of **Yb-SION-2**. Right, **Yb-SION-1**. Color scheme for both spectrum: black, theory; red, experimental.

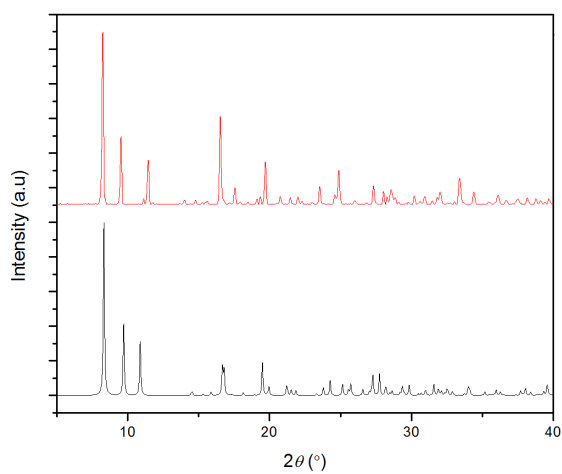

**Figure S10:** PXRD of **Lu-SION-1**. Color scheme: black, theory; red, experimental.

### 3.2 UV/Vis of Ln-SION-2 and Ln-SION-1

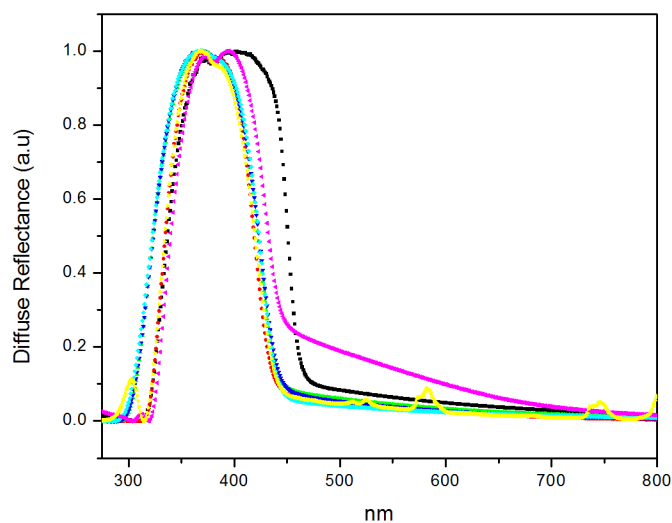

**Figure S11:** Diffuse reflectance spectra of Ce-to-Yb-SION-2. Colour scheme: black, ligand; light blue, Ce; yellow, Nd; dark blue, Eu; magenta, Gd; red, Tb; neon green, Yb.

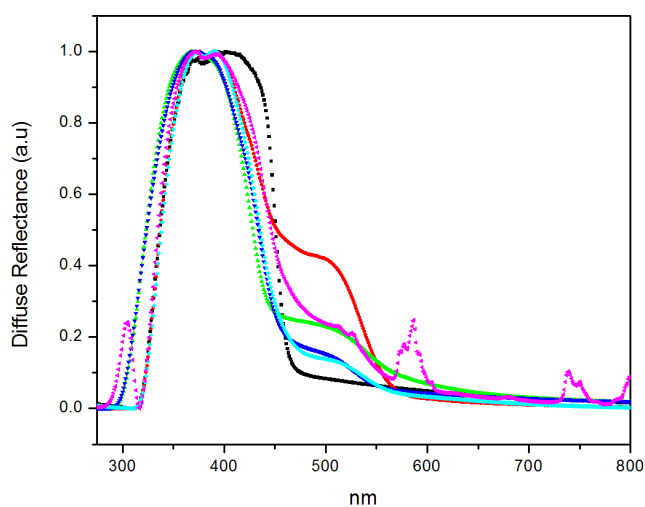

**Figure S12:** Diffuse reflectance spectra of Ce-to-Tb-SION-1. Colour scheme: black, ligand; dark blue, Ce; magenta, Nd; lime green, Eu; neon blue, Gd; red, Tb.



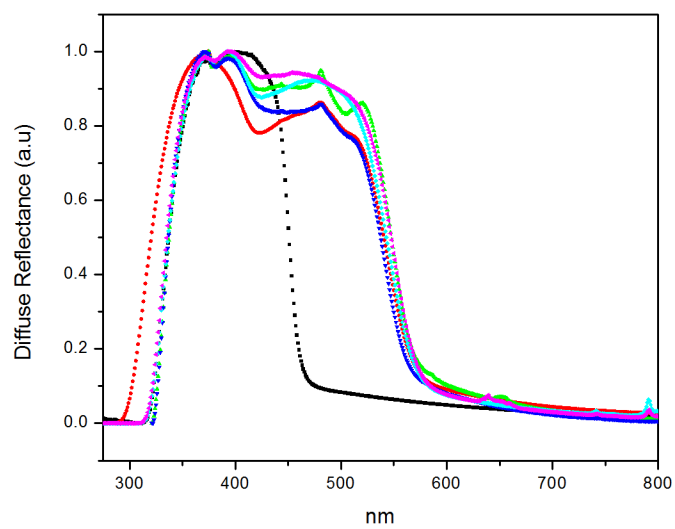

**Figure S13:** Diffuse reflectance spectra of **Dy-to-Lu-SION-1**. Colour scheme: black, ligand; neon blue, Dy; magenta, Ho; lime green, Er; red, Yb; dark blue, Lu.

## 4 Computational details

All the calculations were done using the solid-state quantum chemical code Quantum Espresso (version 6.0). All the geometry optimisations were performed at the gamma point using the semi-local PBEsol exchange correlation functional, using norm-conserving pseudopotentials with a cut-off of 170 Ry. Dispersion force corrections were also employed. The force and energy thresholds were set to 1E-05 Ry and 1E-04 Ry, respectively, while the pressure convergence was set to 1E-01 Kbar. The spin state of single atoms were allowed to relax during the optimization with an SCF convergence threshold of 1E-09. The Density of States were calculated by performing single point calculations at the PBEsol optimized geometries using the non-local hybrid GAUPBE functional. The Brillouin zone for these calculations were sampled using a Monkhorst-Pack grid of 2x3x2 and 2x2x2 k-points for **SION-1** and **SION-2** respectively. Here, the calculations have been performed after solvent removal.

It should be noted that for spin-orbit coupling (and correction) (SO), while it is relevant for the description of the 4f energy level in Ln-based materials, the **SION-1** and **SION-2** electronic structures (top VB and bottom CB) and their related properties (optical transitions) are characterized by  $\pi$  and  $\pi^*$  organic orbitals and 5d metal state, for whose SO coupling (and correction) is negligible. More information on the different spin configurations can be found in in the following sections.

## 5 Computed cell parameters

**Table S1:** Computed cell parameter of the Ln-SION-1, -2 families. The experimental data are from single crystal data (Cambridge Crystallographic Data Center (CCDC) under reference codes CAQHEK (CCDC number: 1503702) and CAQVOI (CCDC number: 1503701).

| Ln-SION-1 | a          | b           | c            | $\alpha$   | $\beta$    | $\gamma$  |
|-----------|------------|-------------|--------------|------------|------------|-----------|
| La        | 14.123     | 6.303       | 13.691       | 90.00      | 93.04      | 90.01     |
| Ce        | 14.028     | 6.274       | 13.762       | 90.01      | 93.66      | 89.98     |
| Nd        | 13.485     | 6.261       | 13.683       | 90.01      | 92.10      | 89.98     |
| Sm        | 12.723     | 6.317       | 13.800       | 90.01      | 92.29      | 89.99     |
| Eu        | 12.714     | 6.290       | 13.842       | 90.02      | 90.76      | 89.97     |
| Gd        | 13.971     | 6.347       | 14.161       | 90.05      | 96.63      | 89.94     |
| Tb        | 14.003     | 6.386       | 14.333       | 90.02      | 97.42      | 90.01     |
| Tb (exp)  | 13.399(3)  | 6.6366(12)  | 15.567(2)    | 90.00      | 98.599(14) | 90.00     |
| Dy        | 14.028     | 6.337       | 13.941       | 90.06      | 96.91      | 89.97     |
| Ho        | 14.081     | 6.406       | 14.506       | 90.11      | 97.80      | 87.97     |
| Er        | 13.610     | 6.289       | 13.960       | 89.99      | 96.16      | 89.99     |
| Tm        | 12.634     | 6.542       | 16.991       | 90.02      | 97.83      | 89.10     |
| Yb        | 14.040     | 6.378       | 14.488       | 90.11      | 97.71      | 89.98     |
| Lu        | 12.234     | 6.284       | 14.032       | 90.03      | 92.14      | 90.00     |
| Y         | 13.945     | 6.430       | 14.365       | 89.99      | 97.63      | 90.02     |
| Ln-SION-2 | a          | b           | c            | $\alpha$   | $\beta$    | $\gamma$  |
| Tb        | 10.251     | 10.876      | 12.614       | 103.76     | 110.19     | 96.30     |
| Tb (exp)  | 10.4608(8) | 10.9006(10) | 12.52939(10) | 104.610(5) | 107.840(4) | 97.204(4) |

## 6 Optimized bond distances

**Table S2:** DFT PBEsol distances in Angstrom for **Ln-SION-1**. O<sub>ac</sub> = Carboxylate Oxygen, O<sub>oxido</sub> = Oxido Oxygen, O<sub>avg</sub> = average distance.

| Distance              | Ce    | Nd    | Eu    | Gd    | Tb    | Er    | Yb    | Lu    |
|-----------------------|-------|-------|-------|-------|-------|-------|-------|-------|
| Ln-O <sub>ac1</sub>   | 2.635 | 2.685 | 2.726 | 2.432 | 2.398 | 2.432 | 2.359 | 2.515 |
| Ln-O <sub>ac2</sub>   | 2.579 | 2.525 | 2.543 | 2.472 | 2.450 | 2.412 | 2.379 | 2.405 |
| Ln-O <sub>ac3</sub>   | 2.520 | 2.530 | 2.511 | 2.415 | 2.409 | 2.378 | 2.361 | 2.370 |
| Ln-O <sub>ac4</sub>   | 2.650 | 2.645 | 2.637 | 2.714 | 2.675 | 2.681 | 2.690 | 2.642 |
| Ln-O <sub>ac5</sub>   | 2.500 | 2.498 | 2.497 | 2.396 | 2.376 | 2.330 | 2.332 | 2.299 |
| Ln-O <sub>ac6</sub>   | 2.760 | 2.675 | 2.660 | 2.382 | 2.365 | 2.326 | 2.326 | 2.345 |
| Ln-O <sub>oxido</sub> | 2.495 | 2.473 | 2.491 | 2.340 | 2.308 | 2.287 | 2.308 | 2.275 |
| Ln-O <sub>dmf</sub>   | 2.550 | 2.551 | 2.546 | 2.431 | 2.409 | 2.396 | 2.387 | 2.350 |
| Ln-O <sub>avg</sub>   | 2.589 | 2.573 | 2.576 | 2.448 | 2.424 | 2.406 | 2.393 | 2.366 |

**Table S3:** DFT PBEsol distances in Angstrom for CO of the oxido group in **Ln-SION-1**. O<sub>oxido</sub> = Oxido Oxygen. A comparison with the CO<sub>oxido</sub> bond distance of the ligand (DHBDC = 1.354), its anionic form (DOBDC = 1.270), its semiquinone (1,4-Cyclohexanedione-2,5-dicarboxylic radical = 1.252), and its quinone form (1,4-Cyclohexanedione-2,5-dicarboxylic acid = 1.229) reveal that the ligand it is always in its anionic state and that an interaction with the metal is present producing an of bond elongation.

| M  | C-O <sub>oxido</sub> |
|----|----------------------|
| Ce | 1.302                |
| Nd | 1.282                |
| Eu | 1.274                |
| Gd | 1.313                |
| Tb | 1.321                |
| Er | 1.306                |
| Yb | 1.300                |
| Lu | 1.285                |

## 7 Frontier orbitals of DHBDC and density of states of Ln-SION-2

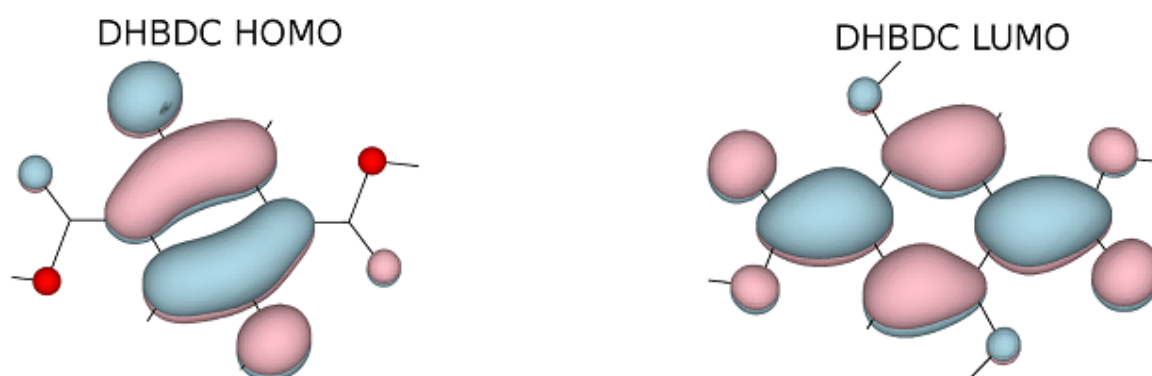

**Figure S14:** Frontier orbitals for the isolated in vacuum DHBDC. Atoms scheme colour: red, O; dark grey, C. The electronic transition is  $\pi \rightarrow \pi^*$  with a band gap of 3.40 eV.

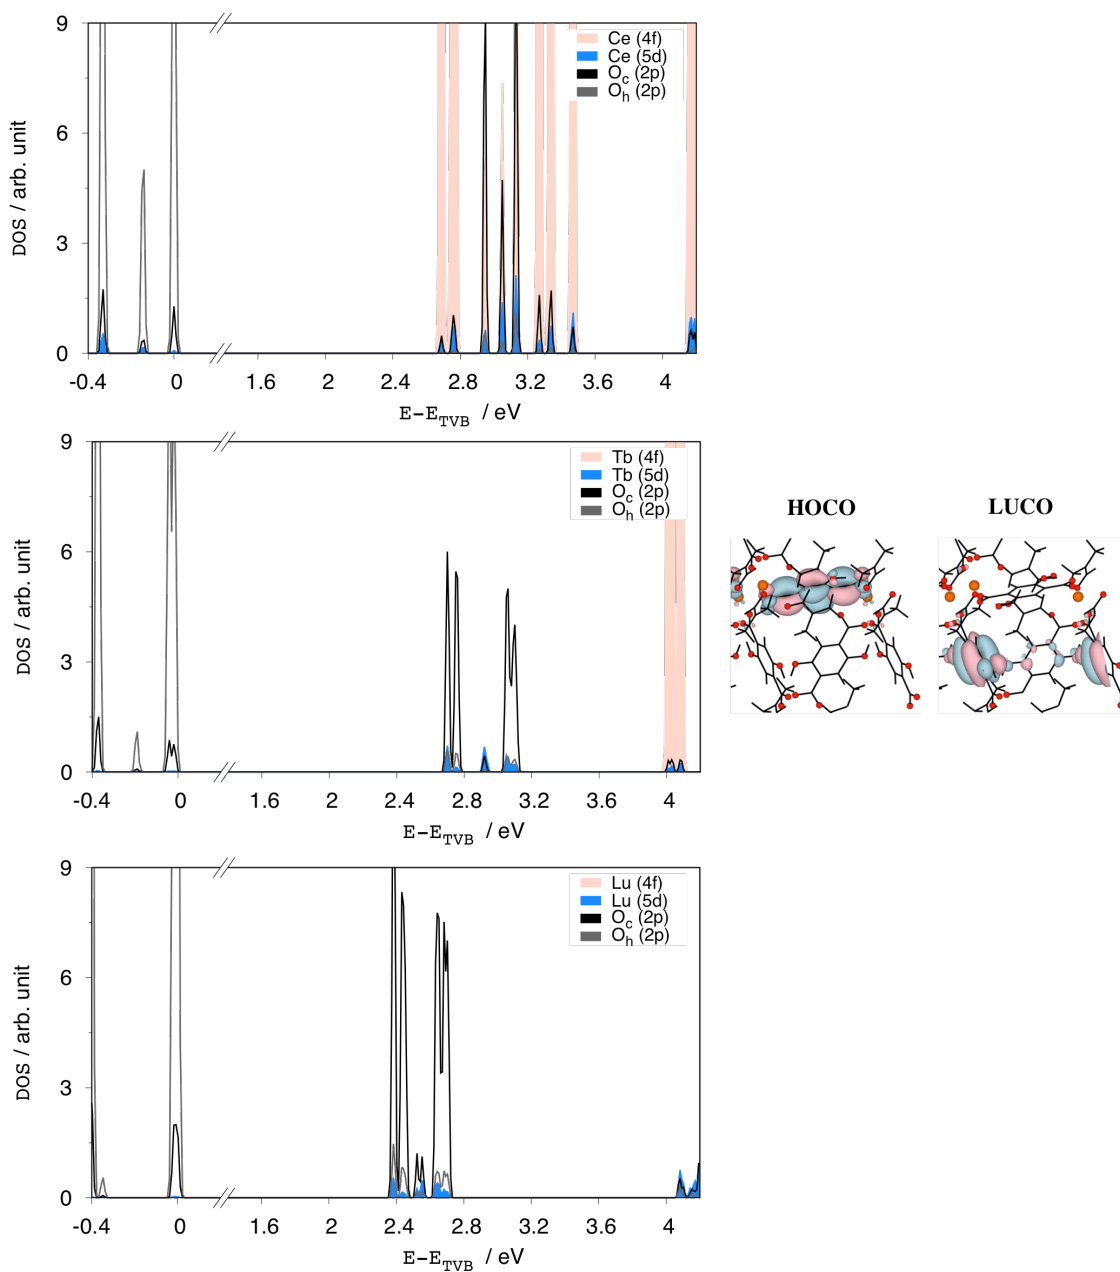

**Figure S15:** The GAUPBE partial Density of State (left) and the corresponding frontier orbitals (right) for the isolated in vacuum **Ce-**, **Tb-** and **Lu-SION-2**. For the DOS the Fermi level was aligned to the HOCOs. Color scheme for pDOS plots: grey, carboxylate O 2p; black, oxido O 2p orbitals; pale orange, Ln 4f orbitals; blue, Ln 5d orbitals. Atoms color scheme: red, O; orange, Tb, dark grey, C.

## 8 Density of state of Ln-SION-1

### Ce-SION-1

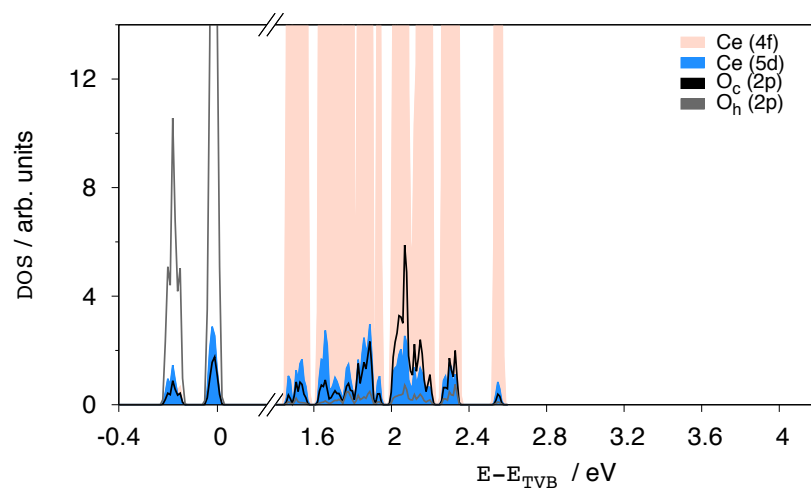

**Figure S16:** pDOS of Ce-SION-1. The valence of Ce(III) is  $[\text{Xe}]4f^15d^0$ . The HOCOs are mainly composed of the ligand  $\pi$ -orbitals whilst the LUCOs are made by the empty f-orbitals. Color scheme for pDOS plots: grey, carboxylate O 2p; black, oxido O 2p orbitals; pale orange, Ln 4f orbitals; blue, Ln 5d orbitals.



## Nd-SION-1

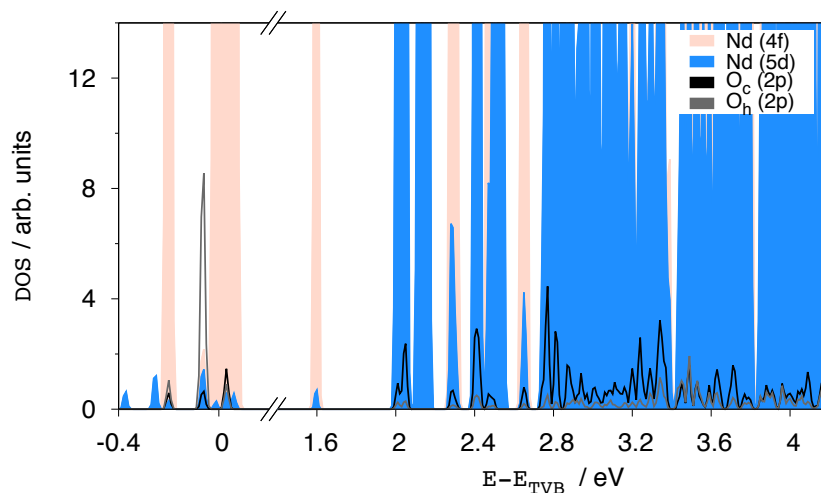

**Figure S17:** pDOS of **Nd-SION-1**. The valence of Nd(III) is  $[\text{Xe}]4f^35d^0$ . The HOCOs are mainly composed of the ligand  $\pi$  orbitals whilst the LUCOs are made by the empty f-orbitals. After the conduction band several mixed metal states are present – many absorption bands are observed in the UV/vis spectrum. Color scheme for pDOS plots: grey, carboxylate O 2p; black, oxido O 2p orbitals; pale orange, Ln 4f orbitals; blue, Ln 5d orbitals.

## Eu-SION-1

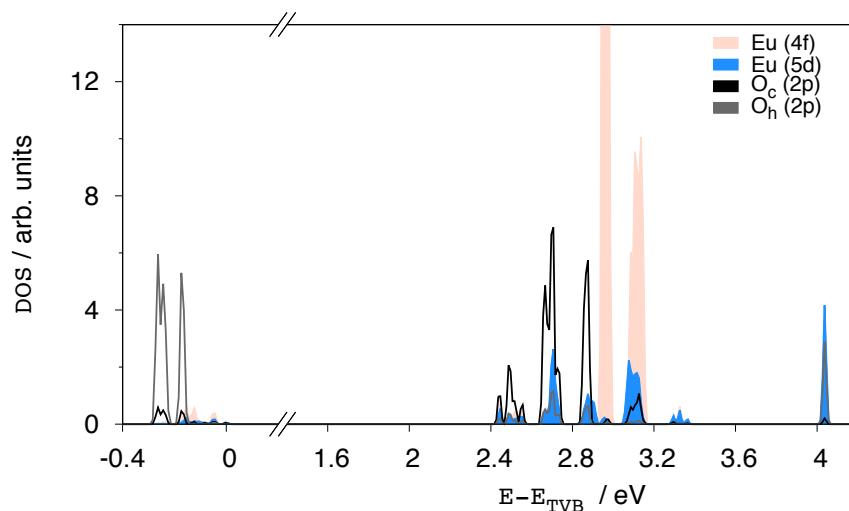

**Figure S18:** pDOS of **Eu-SION-1**. The valence of Eu(III) is  $[\text{Xe}]4f^65d^0$ . The HOCOs are mainly composed of the ligand  $\pi$ -orbitals whilst the LUCOs are made by the ligand's  $\pi^*$  orbitals with only a small amount of state arising from the Eu(5d) orbitals. Color scheme for pDOS plots: grey, carboxylate O 2p; black, oxido O 2p orbitals; pale orange, Ln 4f orbitals; blue, Ln 5d orbitals.

## Gd-SION-1

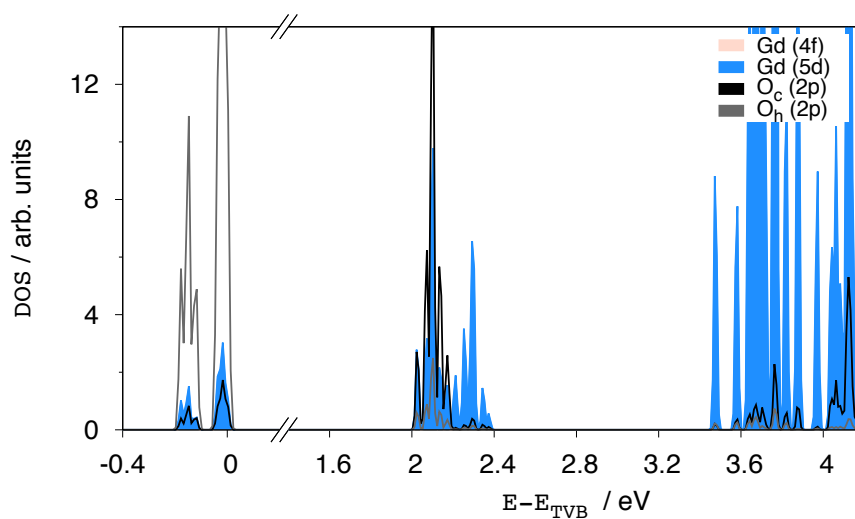

**Figure S19:** pDOS of **Gd-SION-1**. The valence of Gd(III) is  $[\text{Xe}]4f^75d^0$ . The HOCOs are mainly composed of the ligand  $\pi$ -orbitals while the LUCOs are made by a mixture of Ln(5d)/ligand( $\pi^*$ ) orbitals. Color scheme for pDOS plots: grey, carboxylate O 2p; black, oxido O 2p orbitals; pale orange, Ln 4f orbitals; blue, Ln 5d orbitals.

## Tb-SION-1

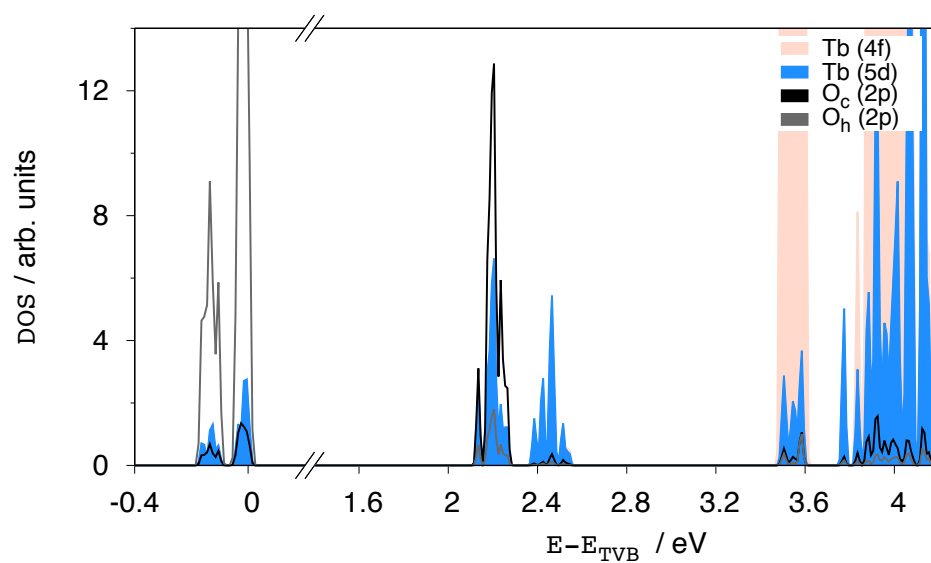

**Figure S20:** pDOS of **Tb-SION-1**. The valence of Tb(III) is  $[\text{Xe}]4f^85d^0$ . The HOCOs are mainly composed of the ligand  $\pi$ -orbitals whilst the LUCOs are made by a mixture of Ln(5d)/ligand( $\pi^*$ ) orbitals. Color scheme for pDOS plots: grey, carboxylate O 2p; black, oxido O 2p orbitals; pale orange, Ln 4f orbitals; blue, Ln 5d orbitals.

## Er-SION-1

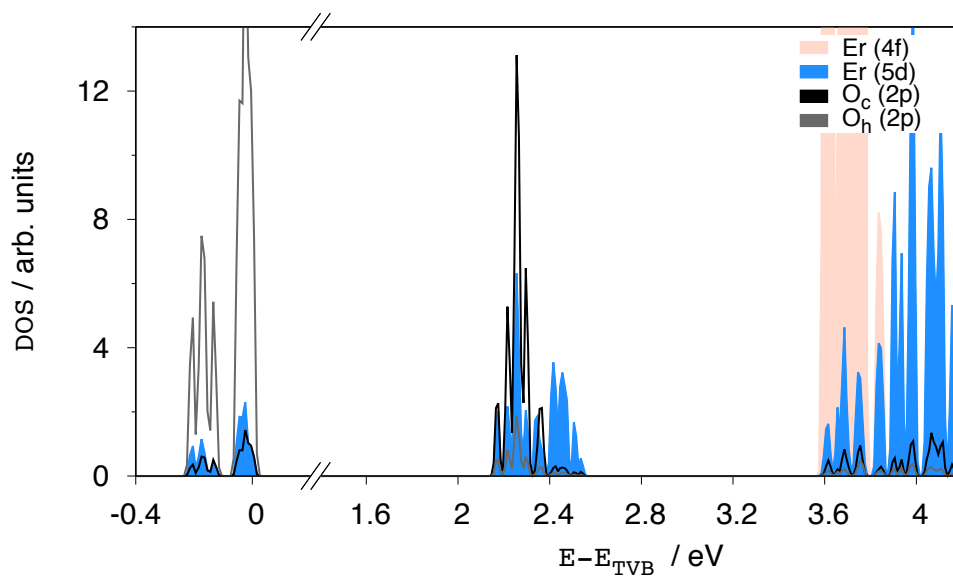

**Figure S21:** pDOS of Er-SION-1. The valence of Er(III) is  $[\text{Xe}]4f^{11}5d^0$ . The HOCOs are mainly composed of the ligand  $\pi$ -orbitals whilst the LUCOs are made by a mixture of Ln(5d)/ligand( $\pi^*$ ) orbitals. Color scheme for pDOS plots: grey, carboxylate O 2p; black, oxido O 2p orbitals; pale orange, Ln 4f orbitals; blue, Ln 5d orbitals.

## Yb-SION-1

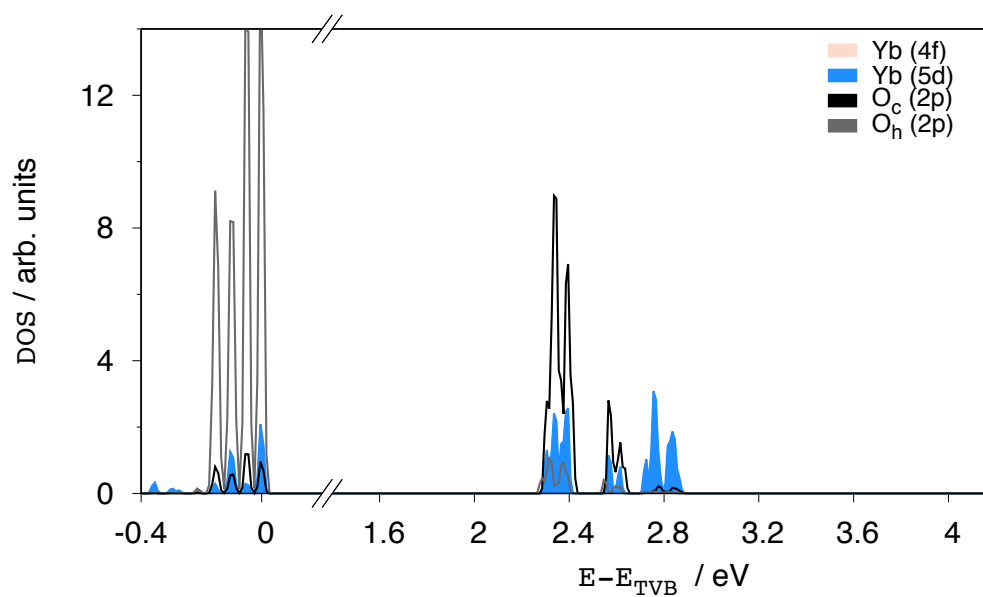

**Figure S22:** pDOS of Yb-SION-1. The valence of Yb(III) is  $[\text{Xe}]4f^{13}5d^0$ . The HOCOs are mainly composed of the ligand  $\pi$ -orbitals whilst the LUCOs are made by a mixture of Ln(5d)/ligand( $\pi^*$ ) orbitals. Color scheme for pDOS plots: grey, carboxylate O 2p; black, oxido O 2p orbitals; pale orange, Ln 4f orbitals; blue, Ln 5d orbitals.

## Lu-SION-1

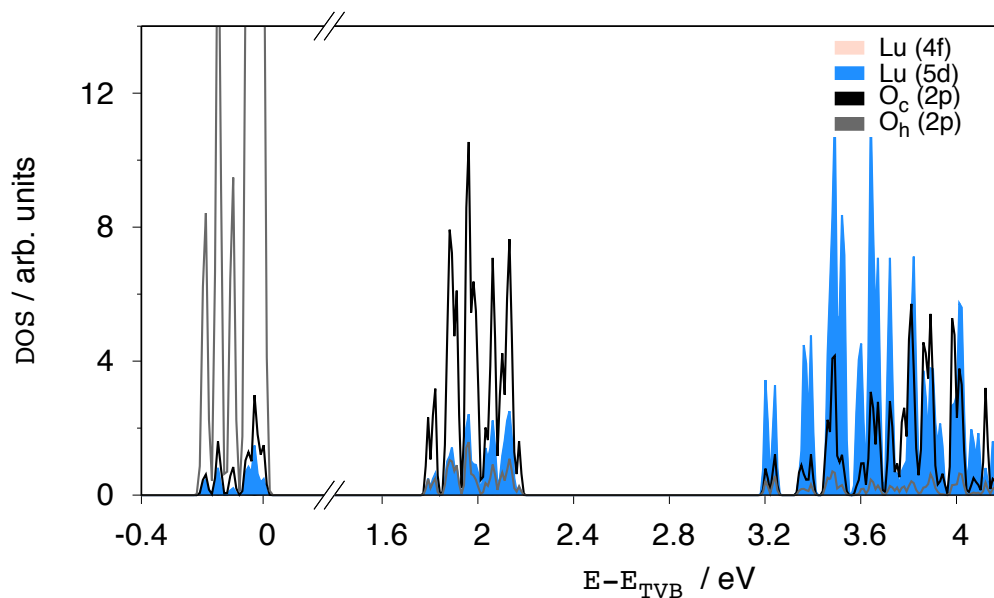

**Figure S23:** pDOS of **Lu-SION-1**. The valence of Lu(III) is  $[\text{Xe}]4f^{14}5d^0$ . The HOCOs are mainly composed of the ligand  $\pi$ -orbitals whilst the LUCOs is made by a mixture of Ln(5d)/ligand( $\pi^*$ ) orbitals. Color scheme for pDOS plots: grey, carboxylate O 2p; black, oxido O 2p orbitals; pale orange, Ln 4f orbitals; blue, Ln 5d orbitals.

## 9 Electronic transition

**Table S4:** DFT GAUPBE direct band gap, calculated Ln(5d)/ligand( $\pi^*$ ) and measured electronic transition for **Ln-SION-1**, and dispersion of the LUCOs through the b-axis. All data in eV.

| M  | Calculated<br>Band Gap | Calculated<br>L( $\pi$ )<br>$\rightarrow$ Ln(5d)/L( $\pi^*$ ) | Measured<br>L( $\pi$ )<br>$\rightarrow$ Ln(5d)/L( $\pi^*$ ) | Calculated<br>LUCO<br>dispersion |
|----|------------------------|---------------------------------------------------------------|-------------------------------------------------------------|----------------------------------|
| Ce | 1.63                   | 2.08                                                          | 2.18                                                        | 0.04                             |
| Nd | 0.43                   | 2.10                                                          | 2.21                                                        | 0.04                             |
| Eu | 2.75                   | 2.75                                                          | 2.10                                                        | 0.04                             |
| Gd | 2.15                   | 2.15                                                          | 2.18                                                        | 0.05                             |
| Tb | 2.13                   | 2.13                                                          | 2.11                                                        | 0.05                             |
| Er | 2.17                   | 2.17                                                          | 2.14                                                        | 0.10                             |
| Yb | 2.34                   | 2.34                                                          | 2.18                                                        | 0.25                             |
| Lu | 1.88                   | 1.88                                                          | 2.18                                                        | 0.18                             |



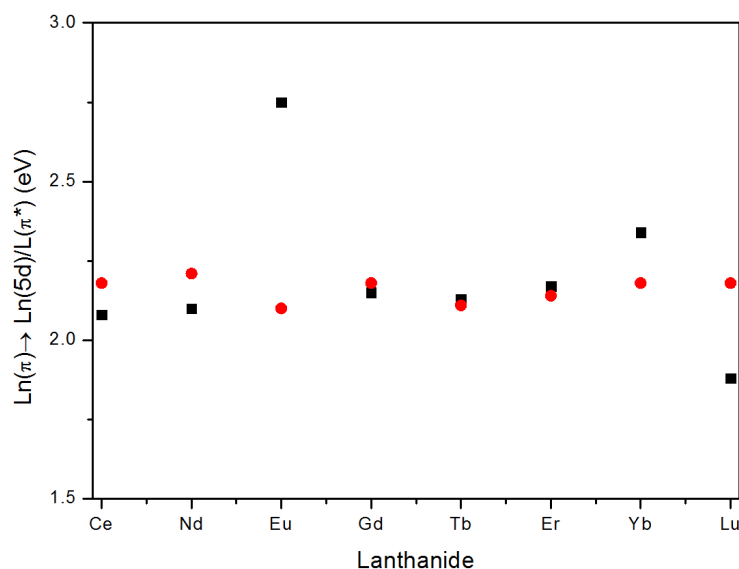

**Figure S24:** Plotted  $L(\pi) \rightarrow Ln(5d)/L(\pi^*)$  calculated (red dots) and measured (black squares).

The strong absorption band at about 400 nm, present in both **SION-1** and **SION-2** spectra, originates from ligand to ligand charge transfer transitions. This is confirmed by the pDOSs (SI Section 7 and Section 8) of the aforementioned materials, which show that the top of the valence band has a  $\pi$  character, localized on the organic moieties of the MOFs, while the conduction band has a strong  $\pi^*$  character. The additional peak at about 500 nm, observed only in the SION-1 series, can be explained by the mixed metal/organic nature of the lower energy lying conduction band present in these materials.

## 10 Current voltage (I-V) curves

We investigated the **Ln-SION-1** series through current-voltage (I-V) curves to determine if electron mobility in **Ce-SION-1** is present, however it is only isolated to the 1-dimension chains within the structure and cannot move freely within the MOF (**Yb-SION-1**). **Ln-SION-1** samples (10 mg) were first ground for 10 minutes in a Agate mortar, followed by dispersion in acetone via a sonicating bath (10 minutes). The samples were prepared by drop-casting the **Ln-SION-1** dispersion samples on F:SnO<sub>2</sub> (FTO) coated glass substrates, which had been coated with 20 nm of poly(3,4-ethylenedioxythiophene) polystyrene sulfonate (PEADOT:PSS). By varying the volume of acetone, we were able to control the thickness of the samples.

The current-voltage (I-V) profile for the FTO/**Ln-SION-1** samples were measured by using an In-Ga drop for the top-contact. Here, a Ga-In eutectic mixture was drop casted on the active layer and used as an electrode. A micromanipulator was used to form an electrical contact with the respective electrodes to measure the I-V characteristics of the device under a nitrogen atmosphere using a custom-built probe station and a Keithley 2612A dual-channel source measure unit. For each measurements, scans of voltage from -20V to 20V (**Yb-SION-1**) and -10V to 10V (**Ce-SION-1**) was swept while measuring the current to obtain the respective I-V curves. Various different locations on the active layer films were measure by moving the In-Ga bead with the micromanipulator. These I-V measurements demonstrate the qualitative semiconductor-like behavior of both the **Ce-SION-1** and **Yb-SION-1** MOFs.

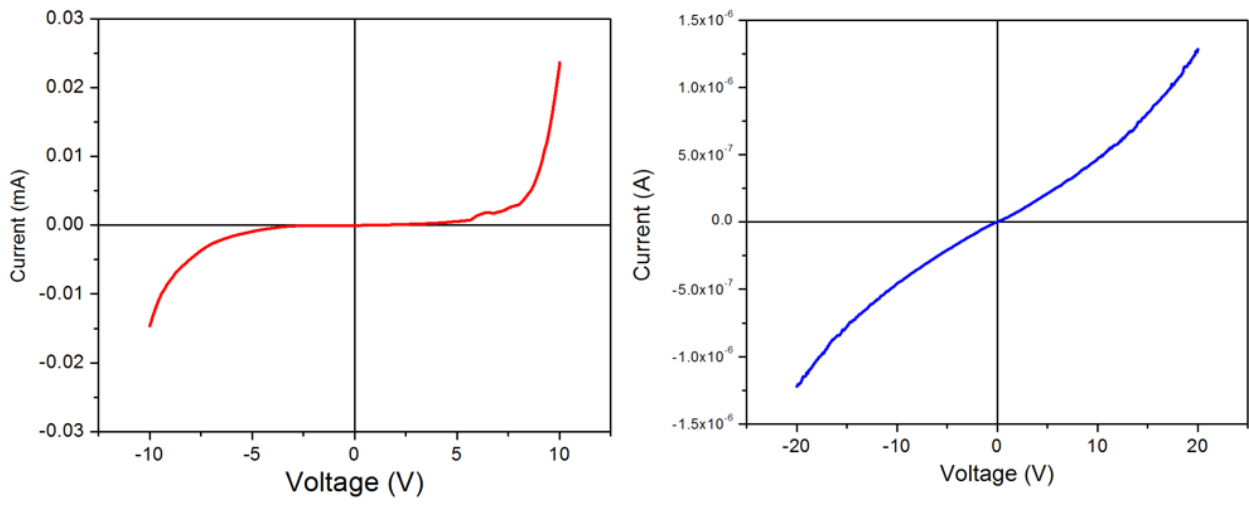

**Figure S25.** Current-Voltage (I-V) curves measured from of device using ITO/PEDOT.PSS/Active Layer/InGa in the dark: left, **Ce-SION-1**; right, **Yb-SION-1**.

## 11 H<sub>2</sub> generation

**Table S4: Electron mobility experiments of Yb-SION-1 and Ce-SION-1 via H<sub>2</sub> generation.** Here, optimized **Yb-SION-1** conditions are in bold, and were applied to the Ce-SION-1 below.

| Sample           | Conditions                                                                                                                                                 | Co-Cat                           | Irradiation time<br>(hrs) | Area of Peak<br>(GC) |
|------------------|------------------------------------------------------------------------------------------------------------------------------------------------------------|----------------------------------|---------------------------|----------------------|
| Yb-SION-1        | CH <sub>3</sub> CN: 81.96 v/v%<br>H <sub>2</sub> O: 1.64 v/v%<br>TEA: 16.39 v/v%<br>MOF: 17 mg<br>Volume of solution: 17 mL                                | Ni <sub>2</sub> P: 5.8 wt %      | 3                         | 162.8                |
| Yb-SION-1        | CH <sub>3</sub> CN: 70 v/v%<br>H <sub>2</sub> O: 15 v/v%<br>TEA: 15 v/v%<br>MOF: 50 mg<br>Volume of solution: 20 mL                                        | Ni <sub>2</sub> P: 9.4 wt %      | 24                        | 549                  |
| Yb-SION-1        | CH <sub>3</sub> CN: 70 v/v%<br>H <sub>2</sub> O: 15 v/v%<br>TEA: 15 v/v%<br>MOF: 50 mg<br>Volume of solution: 20 mL                                        | Ni <sub>2</sub> P: 9.4 wt %      | 40                        | 383                  |
| Yb-SION-1        | CH <sub>3</sub> CN: 64.70 v/v%<br>H <sub>2</sub> O: 17.64 v/v%<br>TEA: 11.76 v/v%<br>MOF: 20 mg<br>Volume of solution: 17 mL                               | Pt: 0.8 wt %                     | 40                        | 240                  |
| <b>Yb-SION-1</b> | <b>CH<sub>3</sub>CN: 81.96 v/v%</b><br><b>H<sub>2</sub>O: 1.64 v/v%</b><br><b>TEA: 16.39 v/v%</b><br><b>MOF: 17 mg</b><br><b>Volume of solution: 17 mL</b> | <b>Ni<sub>2</sub>P: 5.8 wt %</b> | <b>20</b>                 | <b>612</b>           |
| Ce-SION-1        | CH <sub>3</sub> CN: 81.96 v/v%<br>H <sub>2</sub> O: 1.64 v/v%<br>TEA: 16.39 v/v%<br>MOF: 17 mg<br>Volume of solution: 17 mL                                | Ni <sub>2</sub> P: 5.8 wt %      | 24                        | 0                    |

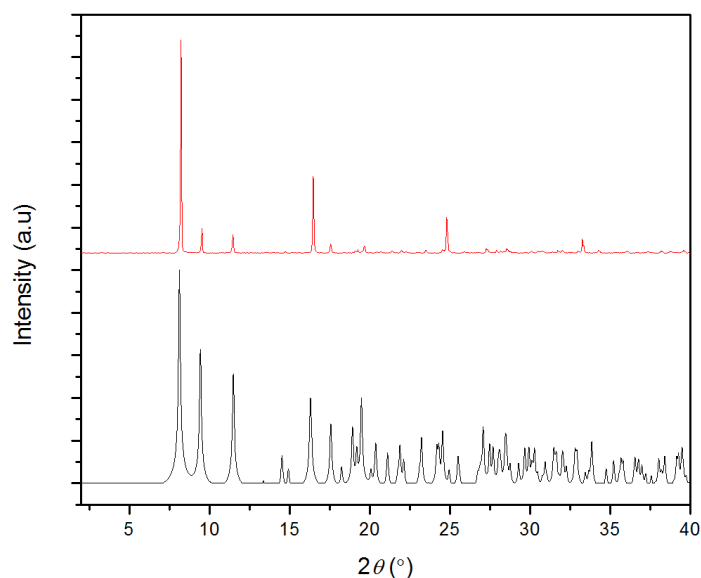

**Figure S26:** PXRD of **Yb-SION-1** following photocatalytic experiments confirms that the material is stable and does not collapse. Color scheme: black, theory; red, experimental.

Based off of the calculated LUCO band dispersions of 0.04, 0.25 and 0.18 eV for **Ce-**, **Yb-**, and **Lu-SION-1**, electron mobility tests were performed. For this, photocatalytic  $H_2$  generation experiments were chosen to represent the potential for electron mobility because following light irradiation, electrons within the MOF have to move to the surface and interact with the co-catalyst and subsequently generate detectable amounts of  $H_2$  (See Table S4 for reaction conditions and results). From previous work published by our group, it is already known the co-catalysts under isolation do not generate  $H_2$ , and a blank sample with just the DHBDC ligand does not as well.<sup>1</sup> PXRD of **Yb-SION-1** performed after the reaction confirm the stability of the MOF under the reaction conditions.

Hydrogen generation was not seen for **Ce-SION-1**, which is attributed to the low band dispersion. Whereas with **Yb-SION-1** (largest band dispersion) electrons have sufficient mobility to reach the surface, and through the process previously described generate detectable amounts of  $H_2$ . It was further confirmed by PXRD that **Yb-SION-1** is stable (Figure S24), and does not undergo degradation.

## 9 References

1. Kampouri, S.; Nguyen, T. N.; Ireland, C. P.; Valizadeh, B.; Ebrahim, F. M.; Capano, G.; Ongari, D.; Mace, A.; Guijarro, N.; Sivula, K.; Sienkiewicz, A.; Forro, L.; Smit, B.; Stylianou, K. C. Photocatalytic hydrogen generation from a visible-light responsive metal-organic framework system: the impact of nickel phosphide nanoparticles. *J. Mater. Chem. A*. **2018**, *6*, 2476-2481.
